# Supplementary material
Source: PubMed Central journal article supplement (PMC4012495)
Supplement: 525dcb9052a3e175dd458f603c3634d5_genetics.113.160119-8.pdf [file 525dcb9052a3e175dd458f603c3634d5_genetics.113.160119-8.pdf]

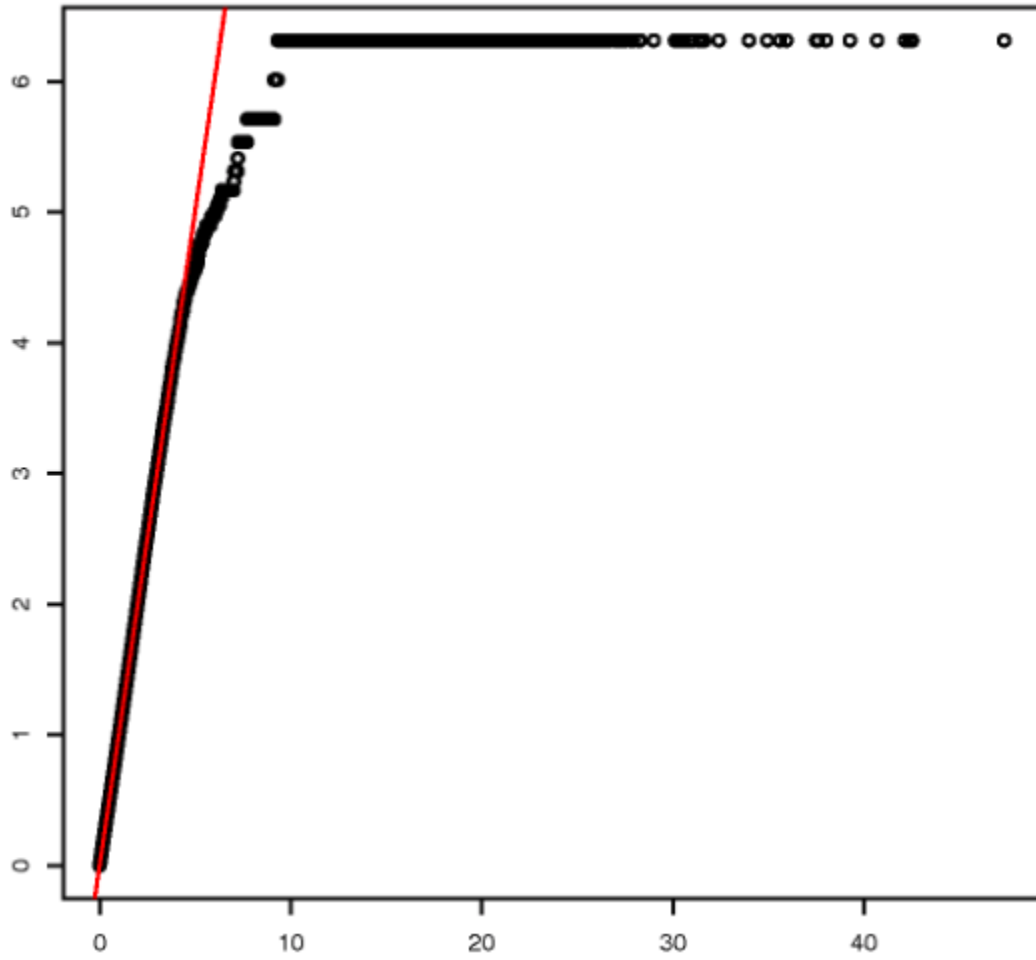

**Figure S1**  $-\log_{10}(\text{GC-corrected P-values})$  (x-axis) of strain effects vs  $-\log_{10}(\text{permutation based p-values})$  (y-axis).
