# Supplementary material
Source: PubMed Central journal article supplement (PMC4012495)
Supplement: ac9f68b663a416cb31a6009f20aff68b_genetics.113.160119-7.pdf [file ac9f68b663a416cb31a6009f20aff68b_genetics.113.160119-7.pdf]

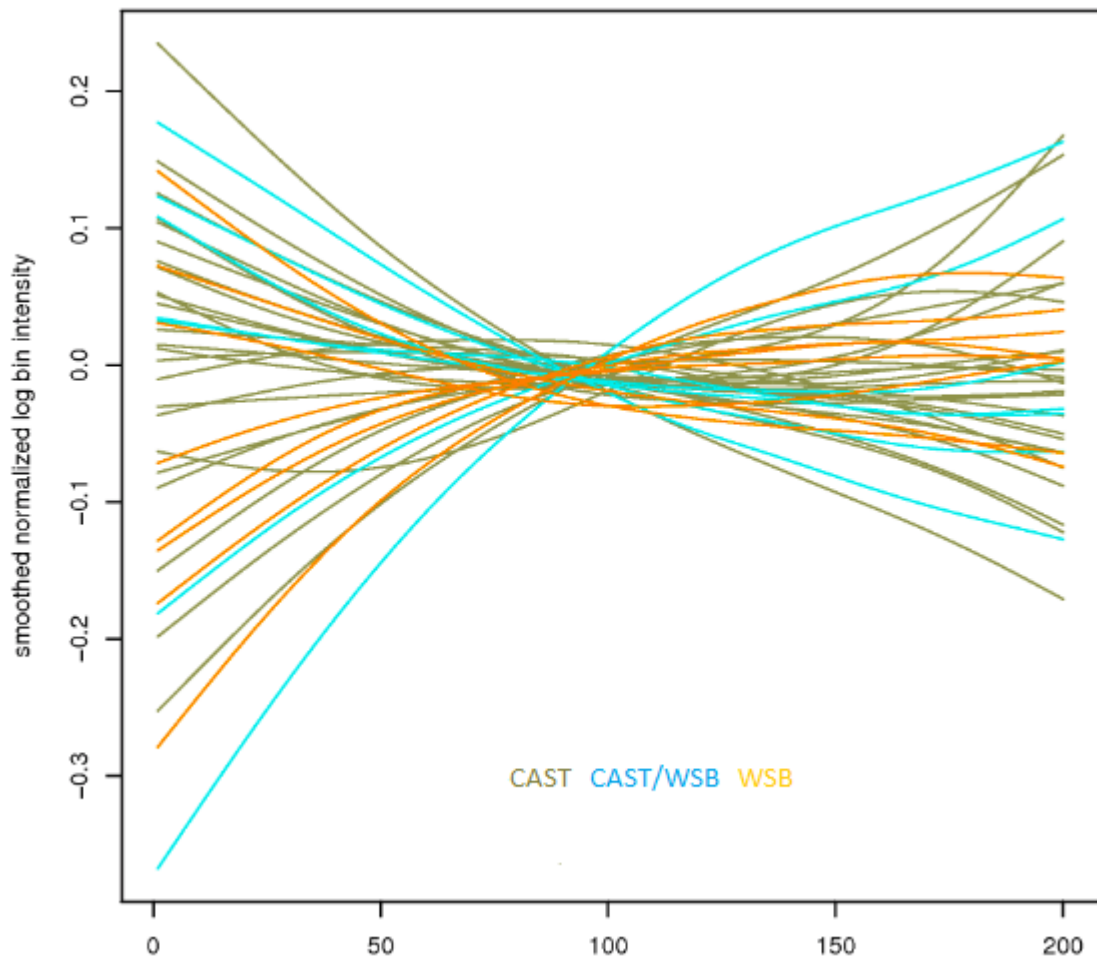

**Figure S5** The %GC-content vs the smoothed normalized log intensity. The X-axis refers the bin number where total of 200 bins are used to divide genes. The lower the bin #, the lower the %GC content.
