# Supplementary material
Source: PubMed Central journal article supplement (PMC4012495)
Supplement: c982cdeced79ffda988b1a2b8ea2bc26_genetics.113.160119-1.pdf [file c982cdeced79ffda988b1a2b8ea2bc26_genetics.113.160119-1.pdf]

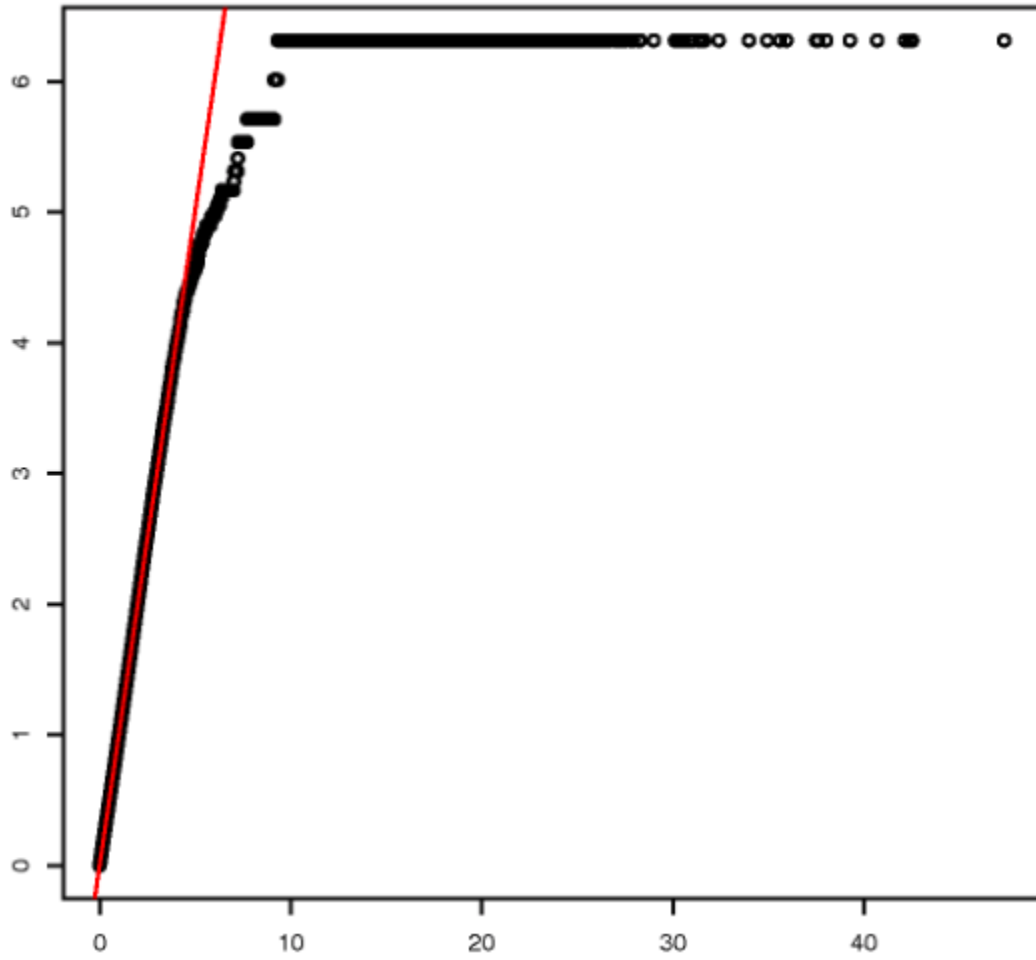

**Figure S1**  $-\log_{10}(\text{GC-corrected P-values})$  (x-axis) of strain effects vs  $-\log_{10}(\text{permutation based p-values})$  (y-axis).

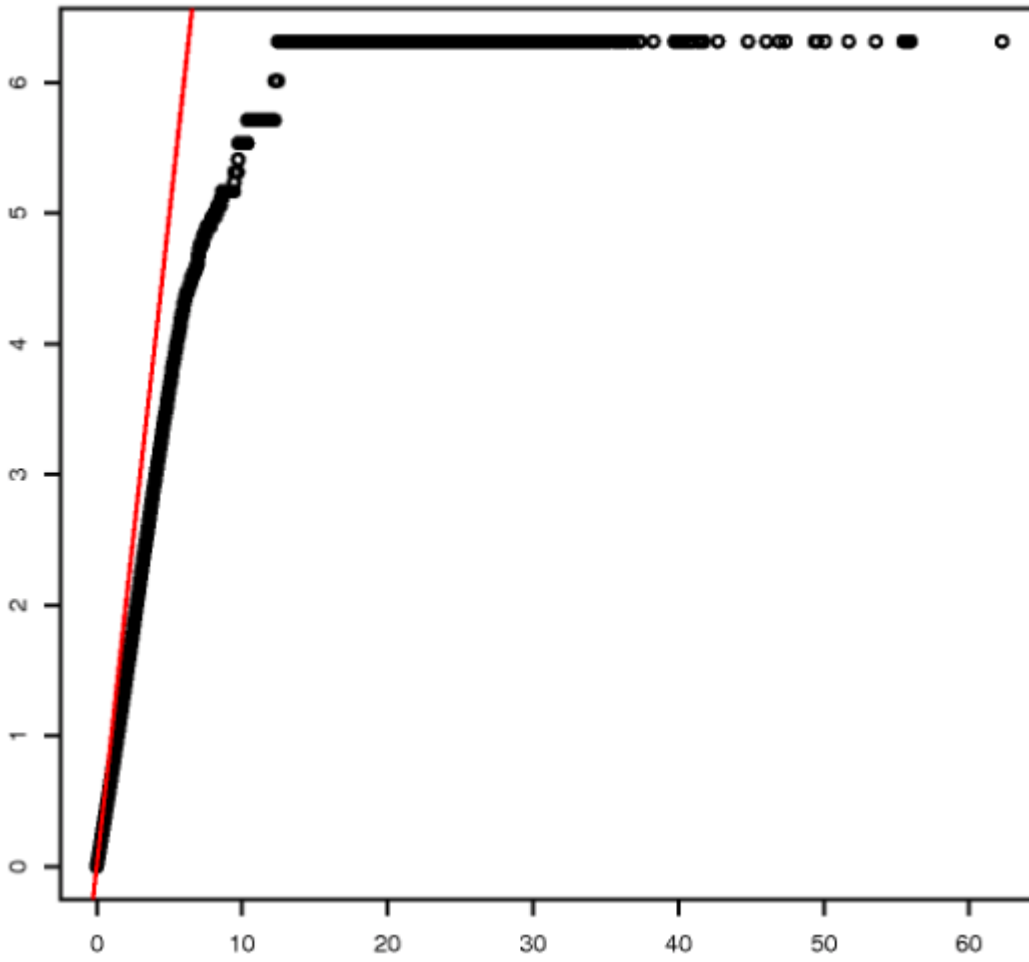

**Figure S2**  $-\log_{10}(\text{GC-uncorrected P-values})$  (x-axis) of strain effects vs  $-\log_{10}(\text{permutation based p-values})$  (y-axis).

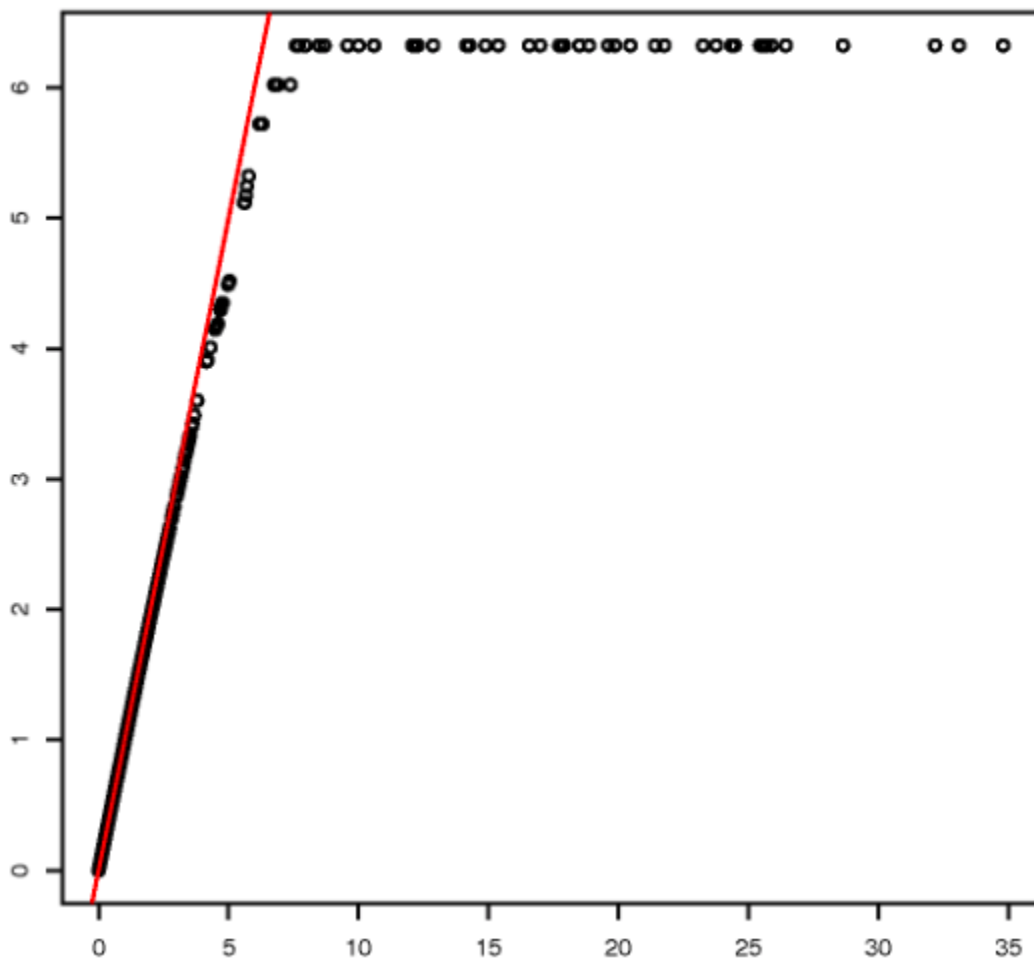

**Figure S3**  $-\log_{10}(\text{GC-corrected P-values})$  (x-axis) of PoO vs  $-\log_{10}(\text{permutation based p-values})$  (y-axis).

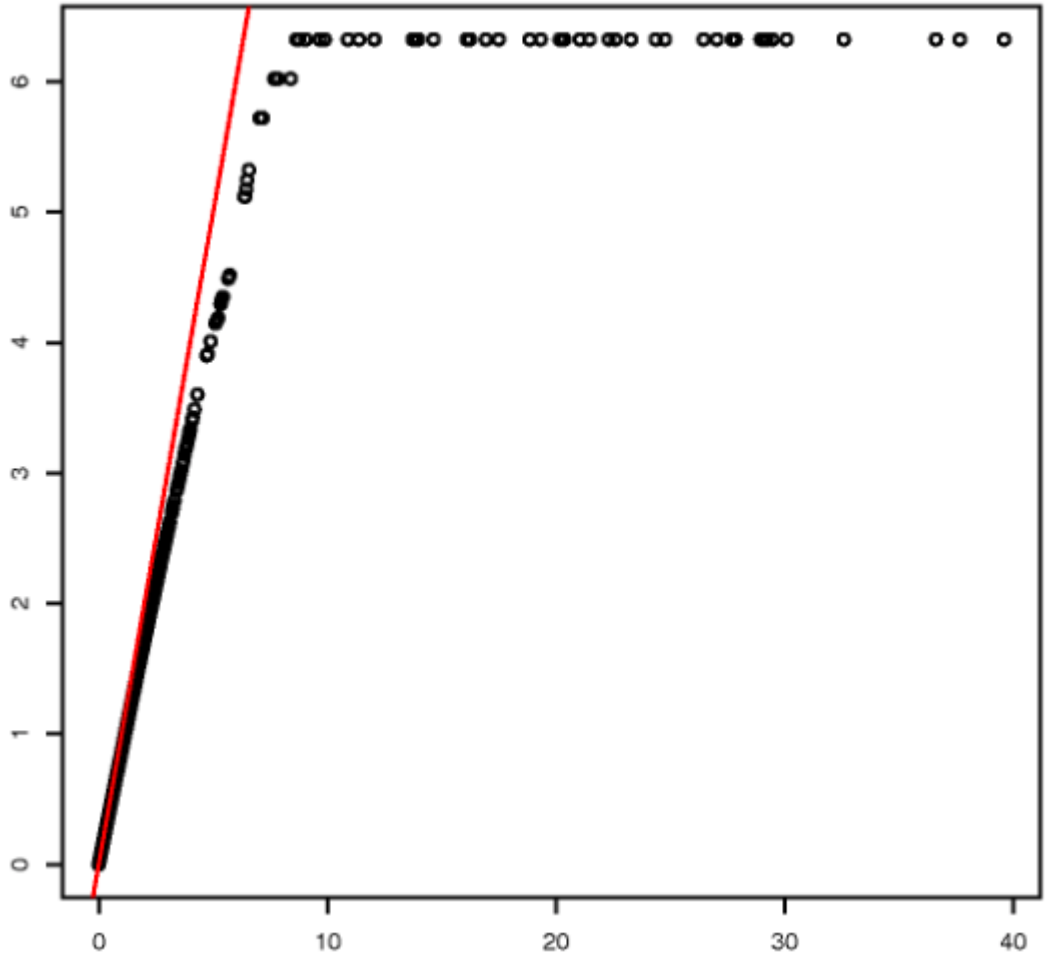

**Figure S4**  $-\log_{10}(\text{GC-uncorrected P-values})$  (x-axis) of PoO vs  $-\log_{10}(\text{permutation based p-values})$  (y-axis).

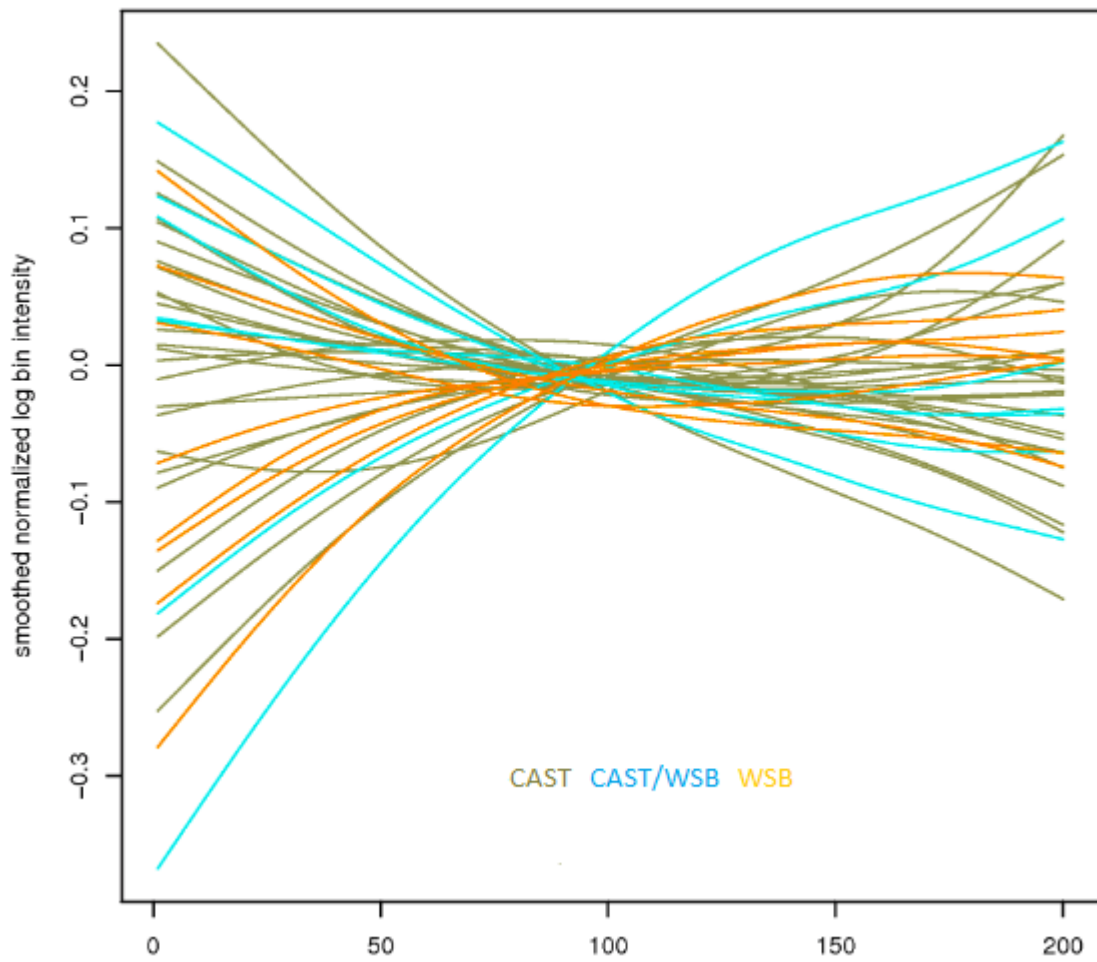

**Figure S5** The %GC-content vs the smoothed normalized log intensity. The X-axis refers the bin number where total of 200 bins are used to divide genes. The lower the bin #, the lower the %GC content.

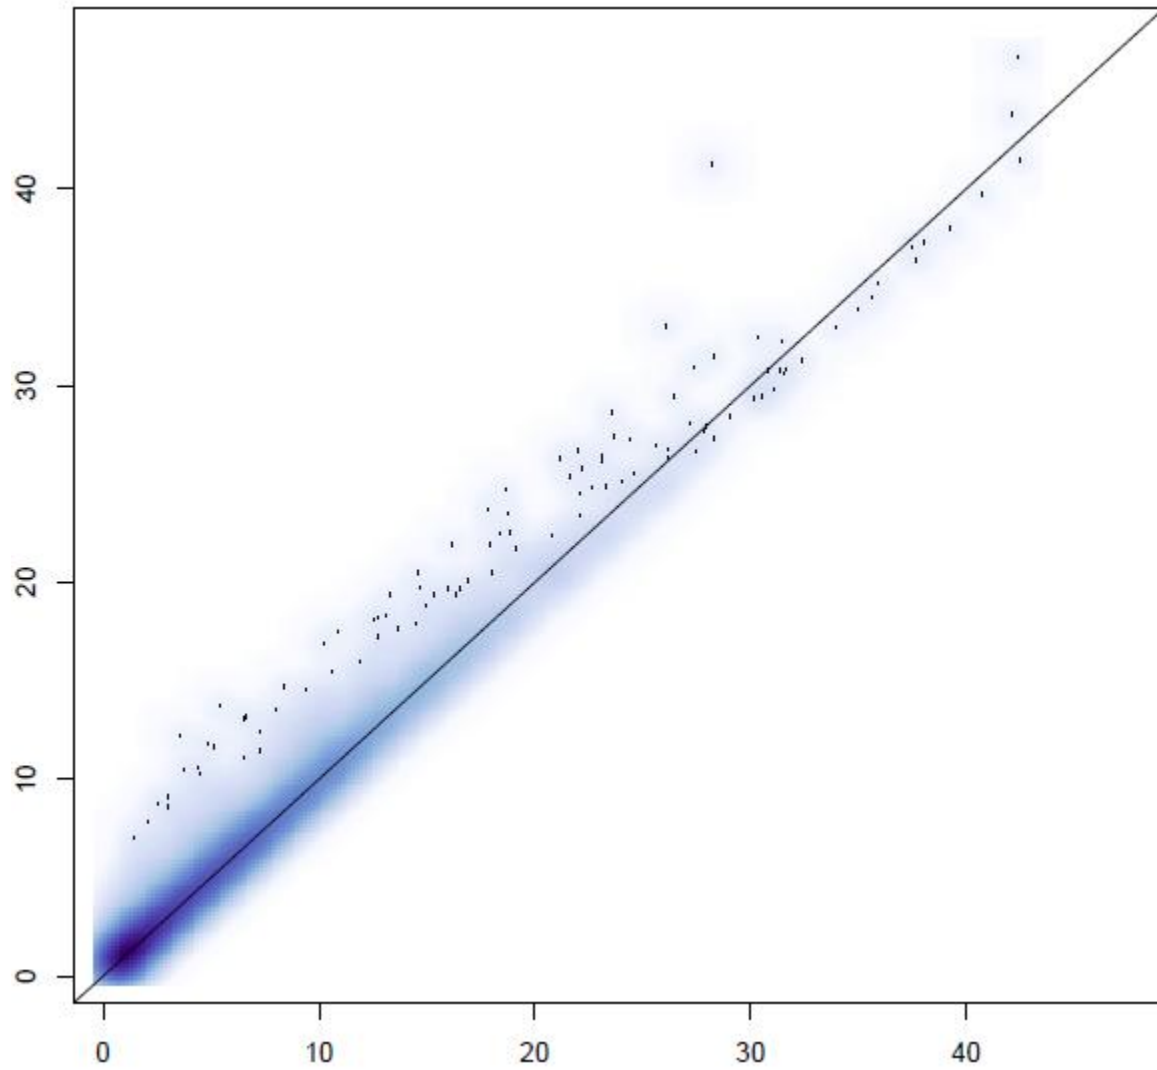

7 Scatter plot of  $-\log_{10}(\text{P-values})$  of strain effects with (y-axis) and without (x-axis) correction of %GC-content.

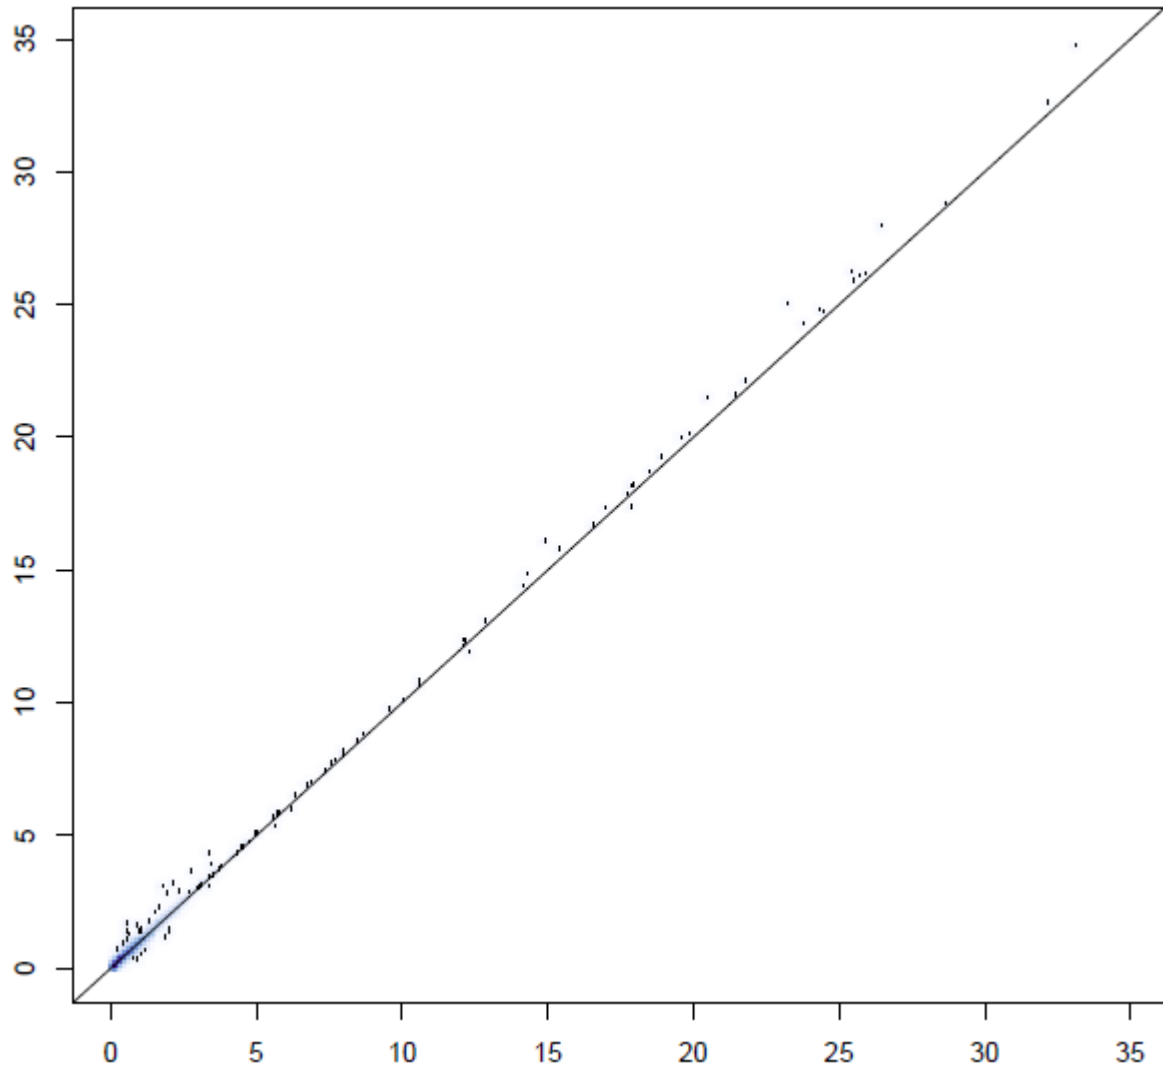

7 Scatter plot of  $-\log_{10}(\text{P-values})$  of PoO with (y-axis) and without (x-axis) correction of %GC-content.
