# Supplementary material
Source: PubMed Central journal article supplement (PMC4012495)
Supplement: e65bc076211a6dee7873830b013c0ff7_genetics.113.160119-5.pdf [file e65bc076211a6dee7873830b013c0ff7_genetics.113.160119-5.pdf]

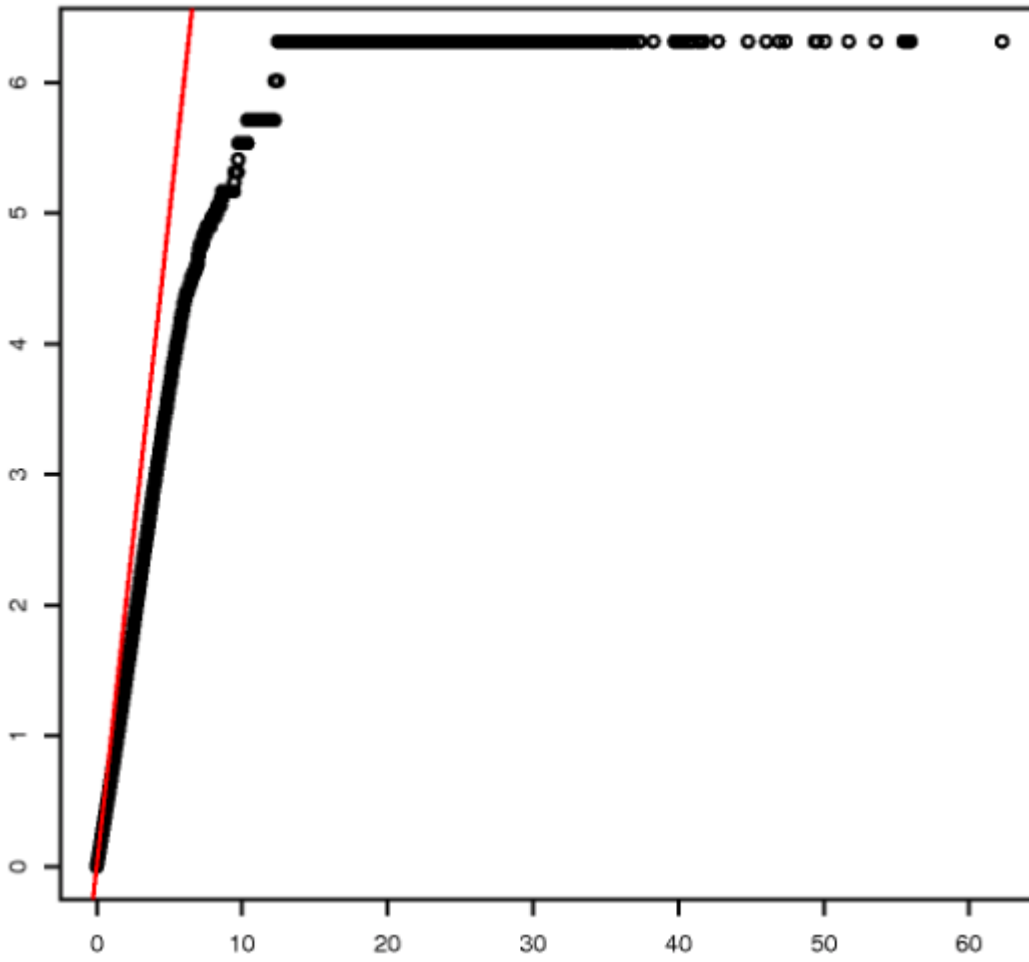

**Figure S2**  $-\log_{10}(\text{GC-uncorrected P-values})$  (x-axis) of strain effects vs  $-\log_{10}(\text{permutation based p-values})$  (y-axis).
