# Supplementary material
Source: PubMed Central journal article supplement (PMC4012495)
Supplement: eddc76bf0a3a344aa89ed9e03ef6ce49_genetics.113.160119-6.pdf [file eddc76bf0a3a344aa89ed9e03ef6ce49_genetics.113.160119-6.pdf]

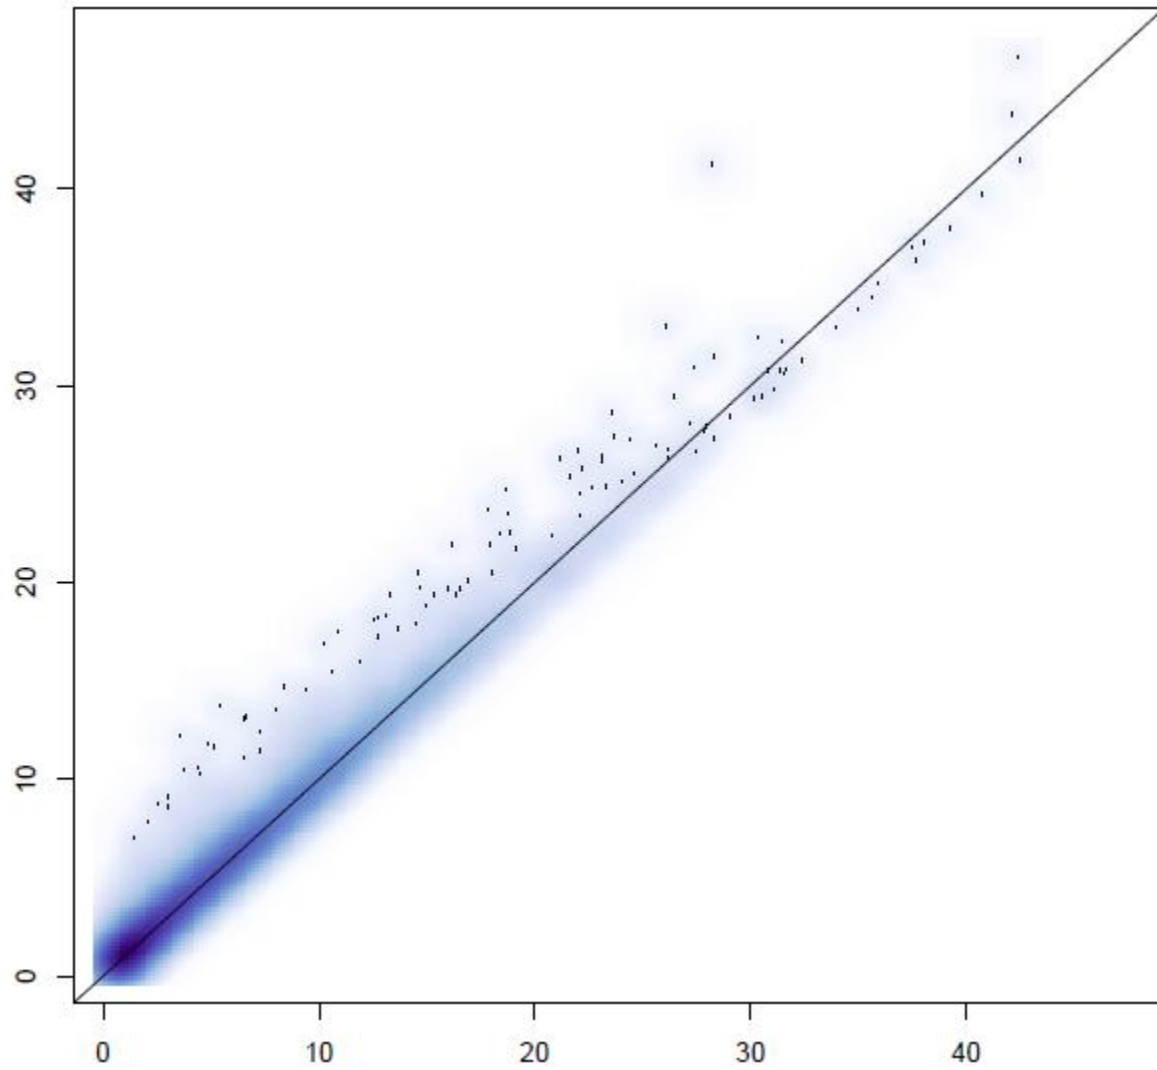

7 Scatter plot of  $-\log_{10}(P\text{-values})$  of strain effects with (y-axis) and without (x-axis) correction of %GC-content.
