# Supplementary material
Source: PubMed Central journal article supplement (PMC4012495)
Supplement: ef0dcf24fa1ac246c6cbcd18bb1c99c1_genetics.113.160119-2.pdf [file ef0dcf24fa1ac246c6cbcd18bb1c99c1_genetics.113.160119-2.pdf]

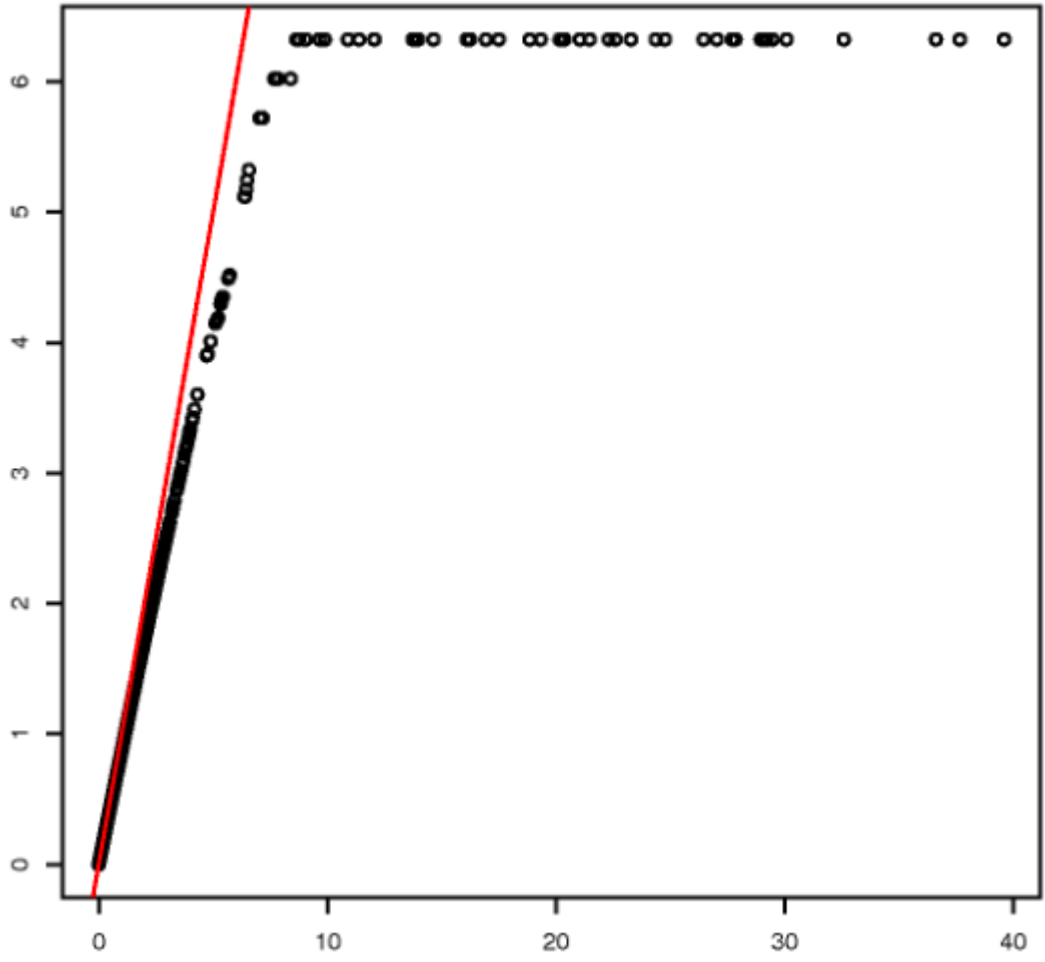

**Figure S4**  $-\log_{10}(\text{GC-uncorrected P-values})$  (x-axis) of PoO vs  $-\log_{10}(\text{permutation based p-values})$  (y-axis).
