# Supplementary material
Source: PubMed Central journal article supplement (PMC4012495)

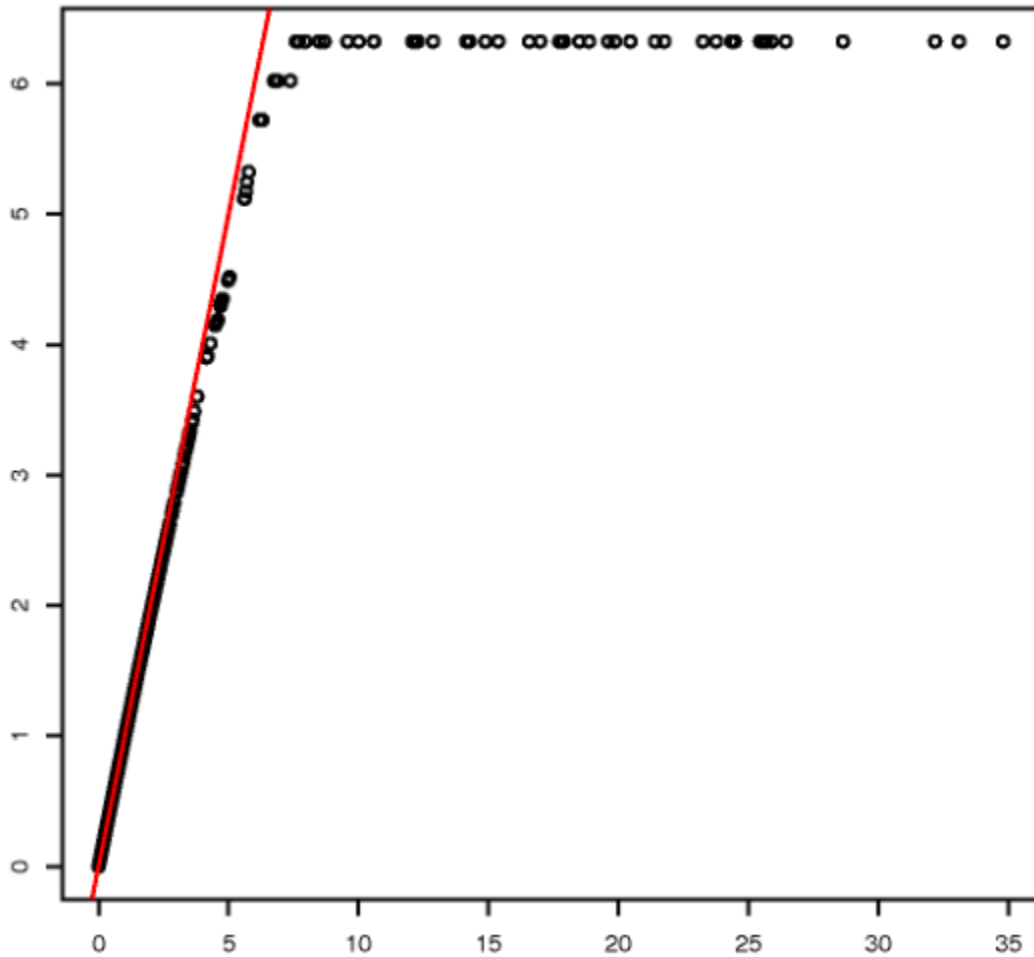

**Figure S3**  $-\log_{10}(\text{GC-corrected P-values})$  (x-axis) of PoO vs  $-\log_{10}(\text{permutation based p-values})$  (y-axis).

Supplement: 837dfee814cb38ae270e6cac3192c855_genetics.113.160119-4.pdf [file 837dfee814cb38ae270e6cac3192c855_genetics.113.160119-4.pdf]

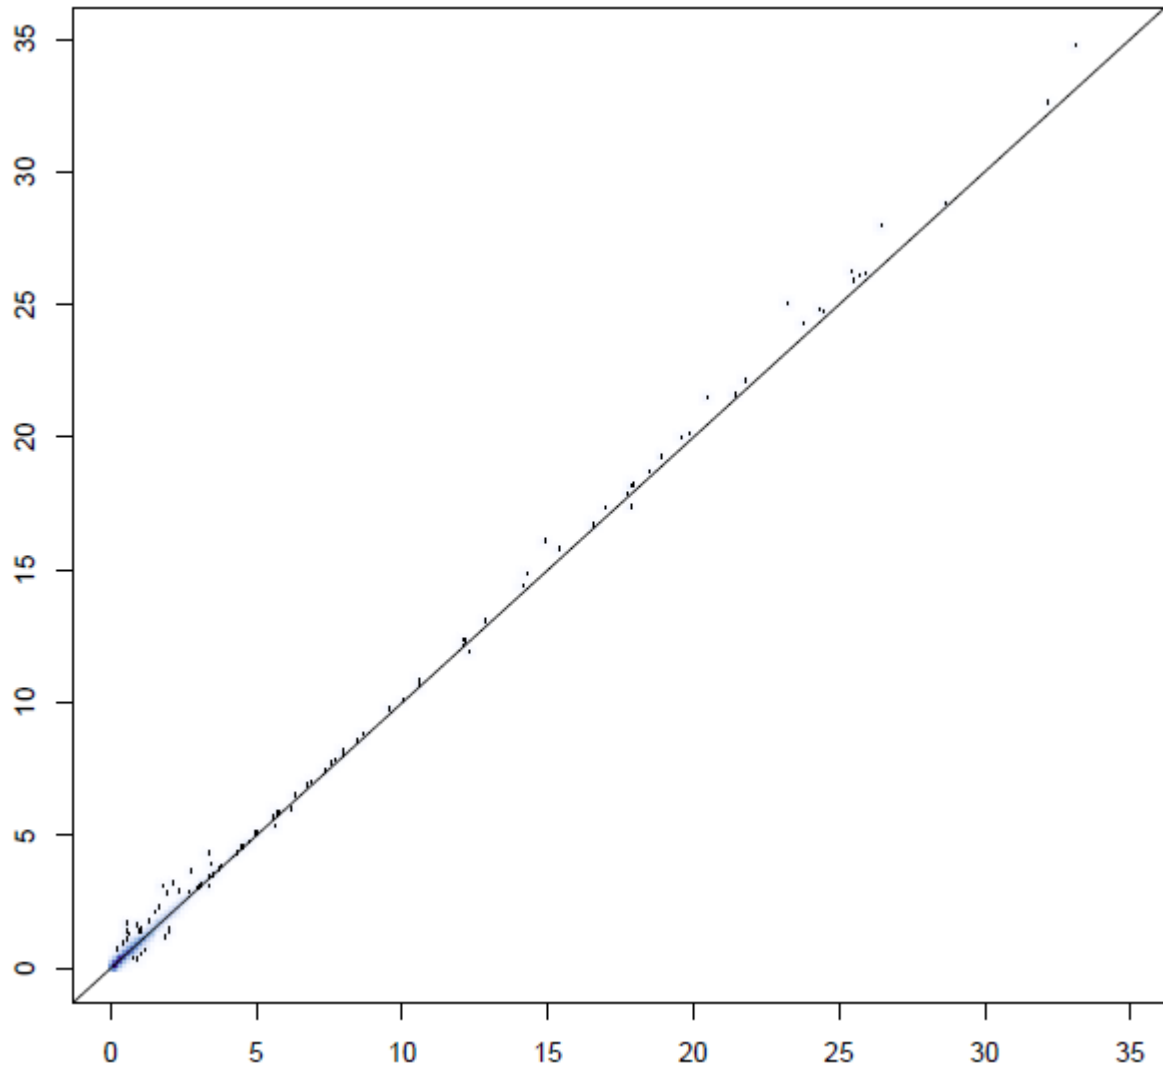

7 Scatter plot of  $-\log_{10}(\text{P-values})$  of PoO with (y-axis) and without (x-axis) correction of %GC-content.

Supplement: 96c66948e026276c5812fc88f7d85586_genetics.113.160119-3.pdf [file 96c66948e026276c5812fc88f7d85586_genetics.113.160119-3.pdf]
